# Supplementary material
Source: publisher site journal article supplement (https://www.dovepress.com/article/300713)
Supplement: Supplementary file 1 [file get_supplementary_file.php]

**Transvenous Phrenic Nerve Stimulation for Treatment of Central Sleep Apnea: Five-Year Safety and Efficacy Outcomes**

Maria R. Costanzo, MDa; Shahrokh Javaheri, MDb,c; Piotr Ponikowski, PhD, MDd; Olaf Oldenburg, PhD, MDe; Ralph S Augostini, MDc; Lee R. Goldberg, MD, MPHf; Christoph Stellbrink, MDg; Henrik Foxh, MD; Alan R. Schwartz, MDi; Sanjaya Gupta, MDj; Scott W. McKane, MSk; Timothy E. Meyer, PhDk; William T. Abraham, MDc for the **rem**edē® System Pivotal Trial Study Group

**Supplemental Material**

Respicardia would like to thank the Clinical Events Committee members:

Chair: Alan Miller (US). Members: Peter Carson (US), Patricia Kelly (US), David Winslow (US)

**Appendix Figure 1 Transvenous Phrenic Nerve Stimulation Device**





**Appendix Table 1 Baseline Characteristic Comparison: PAS Enrolled versus Non-enrolled**

|  |  | **Post Approval Study (PAS)** | | |
| --- | --- | --- | --- | --- |
| Characteristic | **Pivotal Trial**  **(N=151)** | **Eligible for PAS**  **(N=94)** | **Enrolled in PAS**  **(N=53)** | **Did not enroll in PAS**  **(N=41)** |
| Age (years) | 65 ± 13 | 62 ± 13 | 63 ± 11 | 62 ± 15 |
| Male | 89% (135) | 89% (84) | 91% (48) | 88% (36) |
| Body-mass index (kg/m2) | 31 ± 6 | 32 ± 6 | 31 ± 5 | 32 ± 7 |
| Hypertension | 75% (113) | 73% (69) | 81% (43) | 63% (26) |
| Coronary artery disease | 56% (84) | 55% (52) | 55% (29) | 56% (23) |
| Heart Failure | 64% (96) | 53% (50) | 55% (29) | 51% (21) |
| New York Heart Association Class |  |  |  |  |
| I | 12% (18) | 13% (12) | 8% (4) | 20% (8) |
| II | 27% (41) | 26% (24) | 26% (14) | 24% (10) |
| III | 25% (37) | 15% (14) | 21% (11) | 7% (3) |
| IV | 0% | 0% | 0% | 0% |
| Left Ventricular Ejection Fraction (%) | 40 ± 12 | 42 ± 11 | 43 ± 10 | 40 ± 12 |
| Atrial Fibrillation | 42% (64) | 31% (29) | 28% (15) | 34% (14) |
| Previous Stroke | 8% (12) | 9% (8) | 6% (3) | 12% (5) |
| Diabetes | 18% (27) | 31% (29) | 36% (19) | 24% (10) |
| Concomitant cardiac device | 42% (64) | 34% (32) | 30% (16) | 39% (16) |
| Implantable cardioverter defibrillator | 22% (33) | 18% (17) | 11% (6) | 27% (11) |
| CRT-D | 13% (20) | 9% (8) | 9% (5) | 7% (3) |
| Non-CRT pacemaker | 7% (10) | 7% (7) | 9% (5) | 5% (2) |
| CRT-P | <1% (1) | 0% | 0% | 0% |

Continuous reported as mean ± standard deviation. Categorical reported as percent (n).

**Appendix Table 2 Summary of non-Related Serious Adverse Events through 5 Years**

|  | | **Pooled (N=151)** |
| --- | --- | --- |
| **System Organ Class1** | **Lowest Level Term** | **% (n) Subjects** |
| ANY EVENT | ANY EVENT | 71% (107) |
| BLOOD AND LYMPHATIC SYSTEM DISORDERS | ANY EVENT | 3% (4) |
| ANEMIA | 3% (4) |
| CARDIAC DISORDERS | ANY EVENT | 42% (64) |
| ACUTE CORONARY SYNDROME | 2% (3) |
| AORTIC VALVE DISEASE | 4% (6) |
| ATRIAL ARRHYTHMIA | 1% (2) |
| ATRIAL FIBRILLATION | 5% (8) |
| ATRIAL FLUTTER | 1% (1) |
| ATRIAL TACHYCARDIA | 1% (1) |
| CARDIAC ARREST | 1% (1) |
| CHEST PAIN - CARDIAC | 3% (4) |
| COMPLICATION OF CARDIAC SURGERY | 1% (1) |
| COMPLICATION OF HEART FAILURE THERAPY | 2% (3) |
| CORONARY ARTERY DISEASE | 5% (8) |
| CRT DEVICE POCKET EROSION | 1% (1) |
| HEART FAILURE | 23% (35) |
| HYPERTROPHIC OBSTRUCTIVE CARDIOMYOPATHY | 1% (1) |
| MITRAL VALVE DISEASE | 1% (1) |
| MYOCARDIAL INFARCTION | 5% (7) |
| PERICARDIAL EFFUSION | 1% (1) |
| PERICARDIAL TAMPONADE | 1% (1) |
| RIGHT HEART PERFORATION | 1% (1) |
| SICK SINUS SYNDROME | 1% (2) |
| SINUS BRADYCARDIA | 1% (1) |
| SUDDEN DEATH | 2% (3) |
| SUSTAINED VENTRICULAR TACHY ARRHYTHMIA | 9% (14) |
| TRICUSPID VALVE DISEASE | 1% (1) |
| UNSTABLE ANGINA | 1% (2) |
| VENTRICULAR ARRHYTHMIA | 1% (1) |
| VENTRICULAR TACHYCARDIA | 1% (1) |
| DEVICE SYSTEM | ANY EVENT | 1% (1) |
| ELECTIVE EXPLANT | 1% (1) |
| EAR AND LABYRINTH DISORDERS | ANY EVENT | 1% (1) |
| VERTIGO | 1% (1) |
| ENDOCRINE DISORDERS | ANY EVENT | 3% (4) |
| DIABETES | 1% (1) |
| DIABETIC KETOACIDOSIS | 1% (1) |
| DIABETIC TOE | 1% (1) |
| HYPOTHYROIDISM | 1% (1) |
| EYE DISORDERS | ANY EVENT | 1% (1) |
| CATARACT | 1% (1) |
| GASTROINTESTINAL DISORDERS | ANY EVENT | 13% (20) |
| COLONIC PERFORATION | 1% (1) |
| CONSTIPATION | 1% (1) |
| DIVERTICULAR BLEED | 1% (1) |
| DIVERTICULITIS | 1% (1) |
| DYSPHAGIA | 1% (2) |
| ENTEROCOLITIS | 1% (1) |
| GASTRITIS | 1% (2) |
| GASTROESOPHAGEAL REFLUX DISEASE | 1% (2) |
| GASTROINTESTINAL BLEED | 2% (3) |
| GASTROINTESTINAL BLEED SECONDARY TO WARFARIN | 1% (1) |
| GASTROPARESIS | 1% (1) |
| INGUINAL HERNIA | 1% (2) |
| PERFORATED BOWEL | 1% (1) |
| RECTAL PAIN | 1% (1) |
| VENTRAL HERNIA | 1% (1) |
| GENERAL DISORDERS AND ADMINISTRATION SITE CONDITIONS | ANY EVENT | 8% (12) |
| ABDOMINAL DISCOMFORT | 1% (1) |
| ALTERED MENTAL STATUS | 1% (1) |
| BLEEDING DUE TO OVER ANTICOAGULATION | 1% (1) |
| DEGENERATIVE JOINT DISEASE | 1% (2) |
| DIALYSIS SHUNT THROMBOSIS | 1% (1) |
| ELECTIVE DIAGNOSTIC TESTING | 1% (1) |
| FLU LIKE SYMPTOMS | 1% (1) |
| ICD LEAD FAILURE | 1% (1) |
| INGROWN TOENAIL | 1% (1) |
| NON-CARDIAC CHEST PAIN | 1% (1) |
| SIDE EFFECTS TO MEDICATIONS | 1% (1) |
| SINUS INFECTION | 1% (1) |
| HEPATOBILIARY DISORDERS | ANY EVENT | 1% (1) |
| CHOLECYSTITIS | 1% (1) |
| INFECTIONS AND INFESTATIONS | ANY EVENT | 19% (28) |
| ABSCESS | 1% (1) |
| APPENDICITIS | 1% (1) |
| BLADDER INFECTION | 1% (1) |
| BRONCHIAL INFECTION | 1% (1) |
| DIABETIC FOOT INFECTION | 1% (1) |
| ENDOCARDITIS INFECTIVE | 1% (2) |
| ICD IMPLANT SITE INFECTION | 1% (1) |
| LEG CELLULITIS | 1% (2) |
| METHICILLIN-SENSITIVE STAPHYLOCOCCUS AUREUS BACTEREMIA | 1% (1) |
| OSTEOMYELITIS | 1% (1) |
| PNEUMONIA | 5% (8) |
| SEPSIS | 8% (12) |
| UPPER RESPIRATORY INFECTION | 1% (1) |
| URINARY TRACT INFECTION | 1% (1) |
| WOUND INFECTION | 1% (2) |
| INJURY, POISONING AND PROCEDURAL COMPLICATIONS | ANY EVENT | 10% (15) |
| AORTIC INJURY | 1% (1) |
| FRACTURE | 3% (4) |
| HIP FRACTURE | 1% (1) |
| INTRAOPERATIVE NEUROLOGICAL INJURY | 1% (1) |
| JOINT DISLOCATION | 1% (1) |
| LACERATION | 1% (2) |
| POST OPERATIVE BLEEDING | 1% (1) |
| ROTATOR CUFF TEAR | 1% (1) |
| SPINAL FRACTURE | 1% (1) |
| TRAUMA FROM FALL | 3% (4) |
| WOUND COMPLICATION | 1% (1) |
| INVESTIGATIONAL DEVICE IMPLANT | ANY EVENT | 1% (1) |
| IMPENDING POCKET EROSION | 1% (1) |
| METABOLISM AND NUTRITION DISORDERS | ANY EVENT | 4% (6) |
| DEHYDRATION | 1% (1) |
| HYPERGLYCEMIA | 1% (2) |
| HYPERKALEMIA | 1% (1) |
| HYPOGLYCEMIA | 1% (1) |
| HYPOKALEMIA | 1% (1) |
| MUSCULOSKELETAL AND CONNECTIVE TISSUE DISORDERS | ANY EVENT | 10% (15) |
| ARTHRITIS | 5% (7) |
| BACK PAIN | 1% (2) |
| BICEP TENDON TEAR | 1% (1) |
| GENERALIZED MUSCLE WEAKNESS | 1% (2) |
| MENISCUS TEAR | 1% (1) |
| RHABDOMYOLOSIS | 1% (1) |
| SHOULDER PAIN | 1% (1) |
| SPINAL STENOSIS | 1% (2) |
| NEOPLASMS BENIGN, MALIGNANT AND UNSPECIFIED (INCL CYSTS AND POLYPS) | ANY EVENT | 7% (11) |
| ADENOCARCINOMA | 1% (1) |
| BLADDER CANCER | 1% (1) |
| COLON POLYPS | 1% (1) |
| INTRADUCTAL NEOPLASIA OF THE PANCREATIC DUCT | 1% (1) |
| LUNG CANCER | 1% (1) |
| MELANOMA | 1% (1) |
| MULTIPLE MYELOMA | 1% (1) |
| MYELODYSPLASTIC SYNDROME | 1% (1) |
| PROSTATE CARCINOMA | 2% (3) |
| NERVOUS SYSTEM DISORDERS | ANY EVENT | 9% (14) |
| AMNESIA | 1% (1) |
| CARPAL TUNNEL | 1% (1) |
| ENCEPHALOPATHY | 1% (1) |
| HEADACHE | 1% (1) |
| PARESTHESIA | 1% (1) |
| SEIZURE | 1% (1) |
| STROKE | 3% (5) |
| SYNCOPE | 1% (1) |
| TRANSIENT ISCHEMIC ATTACKS | 3% (4) |
| PSYCHIATRIC DISORDERS | ANY EVENT | 2% (3) |
| DEPRESSION | 1% (1) |
| PSYCHOSIS | 1% (1) |
| SUBSTANCE ABUSE | 1% (1) |
| RENAL AND URINARY DISORDERS | ANY EVENT | 5% (8) |
| ACUTE KIDNEY INJURY | 1% (2) |
| ACUTE ON CHRONIC KIDNEY DISEASE | 2% (3) |
| CHRONIC KIDNEY DISEASE | 1% (1) |
| RENAL FAILURE | 1% (2) |
| URINARY TRACT PAIN | 1% (1) |
| URINARY TRACT STENOSIS | 1% (1) |
| REPRODUCTIVE SYSTEM AND BREAST DISORDERS | ANY EVENT | 1% (1) |
| BENIGN PROSTATE HYPERPLASIA | 1% (1) |
| RESPIRATORY, THORACIC AND MEDIASTINAL DISORDERS | ANY EVENT | 6% (9) |
| CHRONIC OBSTRUCTIVE PULMONARY DISEASE EXACERBATION | 1% (1) |
| DYSPNEA | 2% (3) |
| PLEURAL EFFUSION | 1% (1) |
| PULMONARY EDEMA | 2% (3) |
| RESPIRATORY FAILURE | 1% (2) |
| SURGICAL AND MEDICAL PROCEDURES | ANY EVENT | 9% (13) |
| CRT-D GENERATOR AND RV LEAD REPLACEMENT | 1% (1) |
| CRT-D GENERATOR REPLACEMENT | 2% (3) |
| CRT-D IMPLANT | 1% (1) |
| CRT-D UPGRADE | 1% (2) |
| CYCLOPHOTOCOAGULATION | 1% (1) |
| DRUG ELUTING STENT | 1% (1) |
| ICD GENERATOR REPLACEMENT | 1% (1) |
| ICD IMPLANT | 1% (1) |
| ICD SYSTEM MODIFICATION | 1% (1) |
| LEFT SUBTALAR JOINT ARTHRODESIS, HARDWARE REMOVAL AND BONE GRAFTING | 1% (1) |
| PAIN PUMP IMPLANT | 1% (1) |
| RV LACERATION | 1% (1) |
| TOOTH EXTRACTION | 1% (1) |
| VASCULAR DISORDERS | ANY EVENT | 7% (11) |
| ABDOMINAL AORTIC ANEURYSM | 1% (1) |
| CAROTID STENOSIS | 1% (2) |
| HEMATOMA | 1% (2) |
| HYPERTENSION | 1% (2) |
| HYPOTENSION | 1% (2) |
| PERIPHERAL VASCULAR DISEASE | 1% (1) |
| PULMONARY EMBOLISM | 1% (1) |
| VERTEBRAL ARTERY STENOSIS | 1% (1) |
| VERTEBROBASILAR INSUFFICIENCY | 1% (1) |
| 1Uses modified CTCAE V4.03 terminology. | | |

**Appendix Table 3 Kaplan-Meier Time to Event Analysis Details**

|  | **Overall** | **Heart Failure Subgroup** | | |
| --- | --- | --- | --- | --- |
| **Years post implant** | **Survival** | **Survival** | **Cardiovascular Survival** | **Freedom from HF Hospitalization (active therapy subjects only)** |
| 0 | 1.0 (0/151) | 1.0 (0/96) | 1.0 (0/96) | 1.0 (0/87) |
| 1 | 0.96 (6/132) | 0.94 (6/82) | 0.94 (5/82) | 0.87 (11/69) |
| 2 | 0.88 (16/117) | 0.84 (14/70) | 0.90 (9/70) | 0.68 (25/45) |
| 3 | 0.81 (25/93) | 0.72 (23/51) | 0.81 (15/51) | 0.62 (29/33) |
| 4 | 0.78 (29/57) | 0.68 (26/31) | 0.78 (17/31) | 0.59 (30/24) |
| 5 | 0.78 (29/43) | 0.68 (26/25) | 0.78 (17/25) | 0.55 (31/5) |

Results presented as estimate (Cumulative #failed/#still at risk).

**Appendix Table 4 Causes of Death from Pivotal Trial1**

| **Death Cause** | **Number (%) of subjects**  **(N=151)** | **Comments** |
| --- | --- | --- |
| Non-cardiovascular | 11 (7%) |  |
| Pump failure (progression of heart failure) | 11 (7%) | Includes 2 control patients before TPNS therapy activation |
| Sudden cardiac death | 5 (3%) | Includes 2 out of hospital cardiac arrests, 1 death due to ventricular arrhythmia confirmed by device interrogation, 1 due to asystole in the setting of end stage HF confirmed by device interrogation, and 1 other cardiovascular death) |
| Fall-related intracranial bleed | 1 (1%) |  |
| Other cardiovascular reason | 1 (1%) | Complication of cardiac surgery procedure |

Clinical events committee adjudicated all deaths as unrelated to device implant procedure, device or delivered therapy.

1Fox H, Oldenburg O, Javaheri S, et al. Long-term efficacy and safety of phrenic nerve stimulation for the treatment of central sleep apnea. Sleep. 2019 Oct 21;42(11).

**Appendix Table 5.** Baseline characteristics for Heart Failure Subgroup

| **Characteristic** | **Pivotal Trial**  **(n=96)** | **Enrolled in PAS**  **(N=29)** |
| --- | --- | --- |
| Age (years) | 67±12 | 62±13 |
| Male | 91% (87) | 97% (28) |
| Body-mass index (kg/m2) | 31±6 | 32±5 |
| Hypertension | 80% (77) | 93% (27) |
| New York Heart Association Classification |  |  |
| I | 19% (18) | 14% (4) |
| II | 43% (41) | 48% (14) |
| III | 39% (37) | 38% (11) |
| IV | 0% | 0% |
| Left Ventricular Ejection Fraction (%) | 34.5±12.1 (n=91) | 38±12  (n=28) |
| Coronary artery disease | 72% (69) | 72% (21) |
| Atrial Fibrillation | 52% (50) | 41% (12) |
| Previous stroke | 7% (7) | 3% (1) |
| Concomitant cardiac device | 63% (60) | 48% (14) |
| Implantable cardioverter defibrillator | 34% (33) | 21% (6) |
| CRT-D | 21% (20) | 17% (5) |
| Non-CRT pacemaker | 6% (6) | 10% (3) |
| CRT-P | 1% (1) | 0% |
| Diabetes | 36% (35) | 41% (12) |
| Medications |  |  |
| Angiotensin-converting enzyme inhibitor | 61% (59) | 59% (17) |
| Angiotensin receptor blocker | 22% (21) | 21% (6) |
| Aldosterone-blocking agent | 48% (46) | 34% (10) |
| Beta-blocker | 89% (85) | 83% (24) |
| Loop diuretic | 65% (62) | 55% (16) |
| Thiazide diuretic | 23% (22) | 17% (5) |
| Thiazide-like diuretic | 6% (6) | 3% (1) |
| Antiarrhythmic | 14% (13) | 14% (4) |
| Digoxin | 24% (23) | 24% (7) |

Continuous reported as mean ± standard deviation. Categorical reported as percent (n).

**Appendix Table 6.** Baseline characteristics for Non-Heart Failure Subgroup

| **Characteristic** | **Pivotal Trial**  **(n=55)** | **Enrolled in PAS**  **(N=24)** |
| --- | --- | --- |
| Age (years) | 61±14 | 63±10 |
| Male | 87% (48) | 83% (20) |
| Body-mass index (kg/m2) | 32±6 | 30±4 |
| Hypertension | 65% (36) | 67% (16) |
| Left Ventricular Ejection Fraction (%) | 48±6 | 48±5 |
| Coronary artery disease | 29% (16) | 33% (8) |
| Atrial Fibrillation | 25% (14) | 13% (3) |
| Previous stroke | 9% (5) | 8% (2) |
| Concomitant cardiac device | 7% (4) | 8% (2) |
| Implantable cardioverter defibrillator | 0% | 0% |
| CRT-D | 0% | 0% |
| Non-CRT pacemaker | 7% (4) | 8% (2) |
| CRT-P | 0% | 0% |
| Diabetes | 36% (35) | 29% (7) |

Continuous reported as mean ± standard deviation. Categorical reported as percent (n).
